# Supplementary material for: Bacterial Community Shift in Treated Periodontitis Patients Revealed by Ion Torrent 16S rRNA Gene Amplicon Sequencing
Source: PubMed Central journal article supplement (PMC3411582; doi:10.1371/journal.pone.0041606), 2012-08-01
Supplement: pone.0041606.s001.pdf [file pone.0041606.s001.pdf]

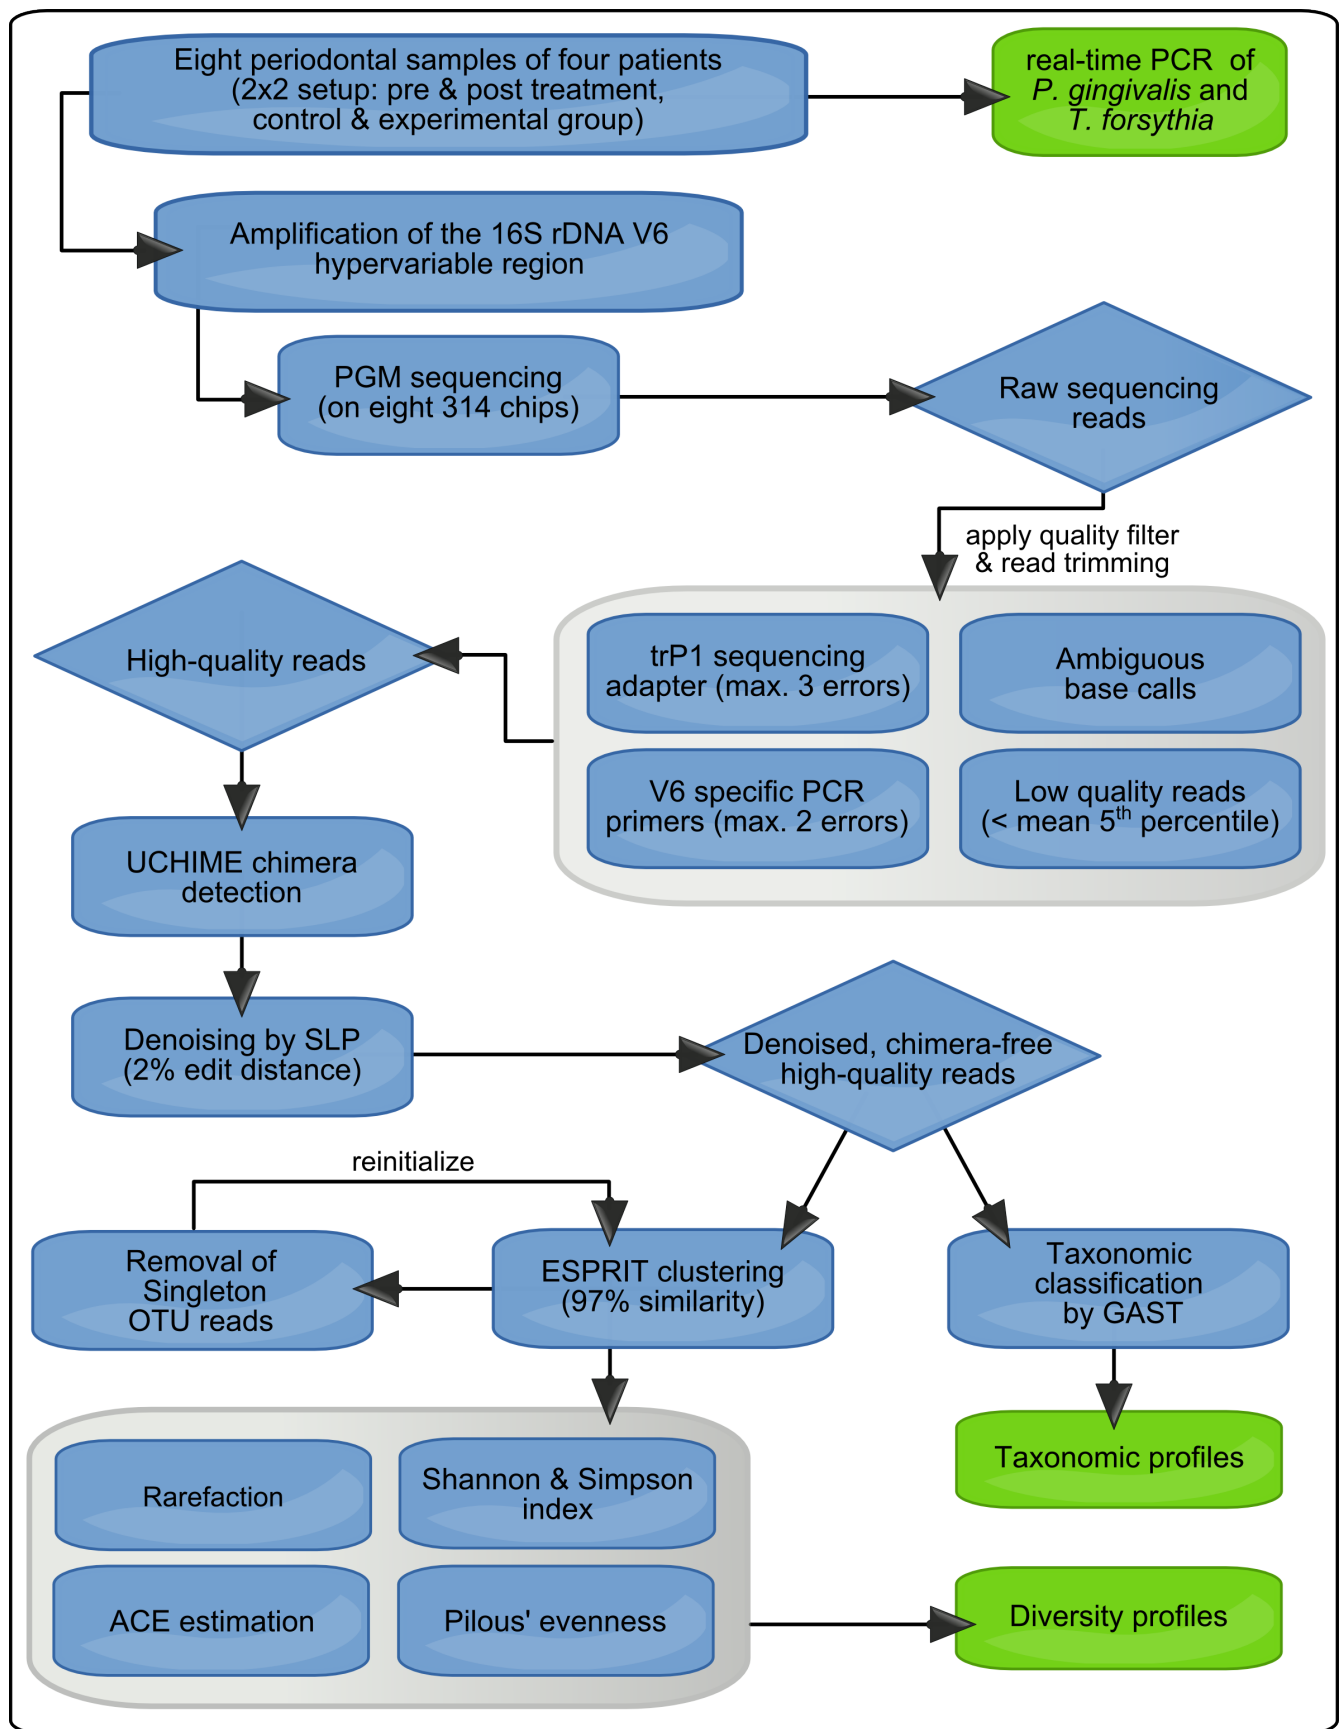

**Figure S1. Schematic overview of the applied experimental and bioinformatic steps throughout the analysis.** For a more detailed description of each individual step please see the Methods section.
