# Supplementary material for: Bacterial Community Shift in Treated Periodontitis Patients Revealed by Ion Torrent 16S rRNA Gene Amplicon Sequencing
Source: PubMed Central journal article supplement (PMC3411582; doi:10.1371/journal.pone.0041606), 2012-08-01
Supplement: pone.0041606.s002.pdf [file pone.0041606.s002.pdf]

**Table S1.** Demographic patient data and clinical parameters at baseline and post intervention

|                                                            | <b>Patient<sup>s</sup></b> |                  |                       |                       |
|------------------------------------------------------------|----------------------------|------------------|-----------------------|-----------------------|
|                                                            | <b>Control-1</b>           | <b>Control-2</b> | <b>Experimental-1</b> | <b>Experimental-2</b> |
| <b>Age (years)</b>                                         | 65                         | 45               | 42                    | 64                    |
| <b>N teeth*</b>                                            | 28                         | 28               | 24                    | 15                    |
| <b>% sites with PPD** ≤ 3 mm (pre / post intervention)</b> | 19.6 / 34.5                | 23.9 / 45.2      | 36.8 / 56.9           | 14.4 / 47.7           |
| <b>% sites PPD 4-6 mm (pre / post)</b>                     | 55.4 / 54.7                | 46.4 / 48.3      | 27.1 / 34.1           | 51.2 / 45.6           |
| <b>% sites PPD ≥ 7 (pre / post)</b>                        | 25 / 10.8                  | 29.7 / 6.5       | 36.1 / 9              | 34.4 / 6.7            |
| <b>% sites with BOP*** (pre / post)</b>                    | 79 / 12                    | 54 / 11          | 59 / 7                | 84 / 14               |
| <b>% sites with plaque index (pre / post)</b>              | 73 / 12                    | 52 / 21          | 50 / 5                | 98 / 37               |

<sup>s</sup> All patients were males, non-smokers with generalized severe chronic periodontitis - i.e. more than 38% of sites with PPD ≥ 6 mm - and with no professional periodontal therapy during the six months preceding the baseline clinical evaluation.

\* For every tooth clinical parameters (PPD, BOP, plaque index) were determined from six sites.

\*\* Pocket probing depth.

\*\*\* Bleeding on probing.
